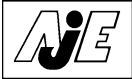

## Original Contribution

# Alcohol Drinking, Cigarette Smoking, and Risk of Colorectal Adenomatous and Hyperplastic Polyps

Martha J. Shrubsole<sup>1,2,3,4</sup>, Huiyun Wu<sup>4</sup>, Reid M. Ness<sup>3,4,5</sup>, Yu Shyr<sup>4</sup>, Walter E. Smalley<sup>1,3,4,5,6</sup>, and Wei Zheng<sup>1,2,3,4</sup>

<sup>1</sup> Vanderbilt Epidemiology Center, Vanderbilt University Medical Center, Nashville, TN.

<sup>2</sup> Division of General Internal Medicine and Public Health, School of Medicine, Vanderbilt University, Nashville, TN.

<sup>3</sup> Geriatric Research Education and Clinical Center, Tennessee Valley Healthcare System, US Department of Veterans Affairs, Nashville, TN.

<sup>4</sup> Vanderbilt-Ingram Cancer Center, Nashville, TN.

<sup>5</sup> Division of Gastroenterology, School of Medicine, Vanderbilt University, Nashville, TN.

<sup>6</sup> Department of Preventive Medicine, School of Medicine, Vanderbilt University, Nashville, TN.

Received for publication June 28, 2007; accepted for publication December 21, 2007.

The authors evaluated alcohol drinking and cigarette smoking in relation to risk of colorectal polyps in a Nashville, Tennessee, colonoscopy-based case-control study. In 2003–2005, cases with adenomatous polyps only ( $n = 639$ ), hyperplastic polyps only ( $n = 294$ ), and both types of polyps ( $n = 235$ ) were compared with 1,773 polyp-free controls. Unordered polytomous logistic regression was used to calculate adjusted odds ratios and 95% confidence intervals. Consumption of at least five alcoholic drinks per week was not strongly associated with development of polyps. Odds ratios for all polyp types were increased for dose, duration, and pack-years of cigarette smoking and were stronger for hyperplastic polyps than for adenoma. Compared with never smoking, dose-response relations were particularly strong for current smoking and duration; for  $\geq 35$  years of smoking, odds ratios were 1.9 (95% confidence interval (CI): 1.4, 2.5) for adenomatous polyps only, 5.0 (95% CI: 3.3, 7.3) for hyperplastic polyps only, and 6.9 (95% CI: 4.4, 11.1) for both types of polyps. Compared with current smoking, time since cessation was associated with substantially reduced odds; for  $\geq 20$  years since quitting, odds ratios were 0.4 (95% CI: 0.3, 0.6) for adenoma only, 0.2 (95% CI: 0.1, 0.3) for hyperplastic polyps only, and 0.2 (95% CI: 0.2, 0.4) for both polyp types. These findings support the adverse role of cigarette smoking in colorectal tumorigenesis and suggest that quitting smoking may substantially reduce the risk of colorectal polyps.

adenomatous polyps; alcohol drinking; colonic polyps; colorectal neoplasms; intestinal polyps; smoking

Abbreviations: CI, confidence interval; PLCO, Prostate, Lung, Colorectal, and Ovarian.

Colorectal adenomatous polyps, also called adenomas, are known and well-defined precursors to colorectal cancer (1). Less well understood is the role of hyperplastic polyps in colorectal carcinogenesis. Until recently, hyperplastic polyps were mostly assumed to have no malignant potential; thus, few studies have evaluated risk factors for these polyps (2–10). However, it appears that some hyperplastic polyps

may develop into microsatellite-unstable colorectal cancers through a hyperplastic polyp-serrated adenoma pathway (11–14). Thus, studies which evaluate both hyperplastic and adenomatous polyps are needed to elucidate possible differing risk profiles for these polyps.

Regular alcohol drinking and tobacco smoking have been associated with both adenomas and cancers in some

Correspondence to Dr. Martha J. Shrubsole, Vanderbilt Epidemiology Center, 2525 West End Avenue, Suite 800, Nashville, TN 37203-1738 (e-mail: martha.shrubsole@vanderbilt.edu).

(7, 15–44) but not other (2, 17, 20, 23–26, 27, 32, 37, 45–47) previous studies. Only a handful of investigators have evaluated these exposures in relation to risk of hyperplastic polyps (2–9), and many of these studies were either small with limited power (5, 6) or were sigmoidoscopy-based (3–5) and thus did not evaluate risk throughout the entire colon. Nevertheless, based upon two of these studies, it appears that some of the previously reported association of adenoma with smoking may be due to mixture of participants with both hyperplastic and adenomatous polyps in the case group (2, 3). Thus, colonoscopy-based studies are needed which separately evaluate risk associated with each polyp type. In this study, we evaluated whether regular alcohol drinking and cigarette smoking were related to hyperplastic polyps, adenomatous polyps, or both types of polyps, using data from a large, ongoing colonoscopy-based study of colorectal polyps.

## MATERIALS AND METHODS

### The Tennessee Colorectal Polyp Study

Participants were part of the Tennessee Colorectal Polyp Study, an ongoing colonoscopy-based case-control study being conducted in Nashville, Tennessee. Study methods have been published elsewhere (48). Briefly, eligible participants aged 40–75 years were identified from patients scheduled for colonoscopy at the Vanderbilt Gastroenterology Clinic and the Veterans Affairs Tennessee Valley Health System Nashville campus between February 1, 2003, and December 31, 2005. Excluded from our study were participants who had genetic colorectal cancer syndromes (e.g., hereditary nonpolyposis colorectal cancer or familial adenomatous polyposis) or a prior history of inflammatory bowel disease, adenomatous polyps, or any cancer other than nonmelanoma skin cancer. Participants were recruited at colonoscopy. Potential participants missed at colonoscopy were recruited after colonoscopy ( $n = 331$ ). The study was approved by relevant committees for the use of human subjects in research.

Among 4,623 eligible persons, 3,094 (67 percent) provided written informed consent and participated in at least one component of the study. Participants and nonparticipants were similar with respect to age, sex, and study location. Participants were slightly more likely to have a family history of colorectal neoplasia as an indication for colonoscopy. Among participants, 2,676 (58 percent of eligible persons and 87 percent of participants) completed a telephone interview following colonoscopy and were included in this analysis. Participants also completed a self-administered food frequency questionnaire developed to capture information on diet in the southeastern United States (49).

On the basis of the colonoscopy and pathology findings, participants were assigned as polyp-free controls, persons with other diagnoses, or cases with hyperplastic polyps only, adenomatous polyps only, or both adenomatous and hyperplastic polyps. In order to be diagnosed as a control, the participant must have had a complete colonoscopy reaching the cecum and have been polyp-free at colonoscopy. The current analyses included 299 cases with hyperplastic polyps

only, 639 cases with adenomatous polyps only, 234 cases with both adenomatous and hyperplastic polyps, and 1,773 polyp-free controls, including 299 participants from a pilot feasibility study. (The pilot study was conducted in 2001–2002 and followed the same protocols as the full-scale study.) Both studies were approved by the Vanderbilt University institutional review board.

### Assessment of alcohol drinking and smoking

Following colonoscopy, a standardized telephone interview was conducted by trained interviewers to obtain information on medication use, demographic factors, medical history, anthropometric factors, and lifestyle, including questions on smoking and alcohol drinking. The alcohol drinking questions defined regular drinking as consumption of five or more drinks per week for 12 months in a row. The questions elicited information on the age at which regular drinking began, whether the participant was still drinking regularly, the age at which regular drinking stopped, the total number of years of regular drinking, and the average number of drinks consumed per week. Information on type of alcohol consumed was not collected in the telephone interview. Regular cigarette smoking was defined as smoking of at least one cigarette per day for at least 3 months in a row. The questions on cigarette smoking elicited information on age at initiation of smoking, whether the participant was still smoking regularly, the age at which regular smoking stopped, the average number of cigarettes smoked per day (either currently or before quitting), and the largest number of cigarettes smoked per day during the participant's lifetime. Participants were also asked about whether they had ever smoked pipes or cigars and whether they had ever used chewing tobacco or other forms of tobacco.

### Data analysis

Participants with incomplete information on alcohol drinking ( $n = 32$ ) or smoking ( $n = 2$ ) were excluded from those analyses. Chi-squared statistics and  $t$  tests were used to evaluate case-control differences in the distribution of potentially confounding factors. Odds ratios were used to measure the association of polyp risk with cigarette smoking or alcohol use. Multinomial logistic regression models were used to estimate odds ratios and 95 percent confidence intervals, after adjustment for potential confounders (50). Risk factors identified previously as having an independent association with polyps in this population were controlled in all models. These included age, sex, study location, educational attainment, body mass index, height, physical activity, and menopausal status. Models also controlled for race/ethnicity; year of recruitment; type of recruitment (pre- or post-colonoscopy); indication for colonoscopy; family history of colorectal neoplasia; use of nonsteroidal antiinflammatory drugs; daily intakes of fruits, vegetables, dairy products, and meat; and alcohol drinking or duration of smoking. Age was included as a continuous variable throughout the analyses, and categorical variables were treated as indicator variables in the model. Dose-response trends were estimated on the

basis of incremental odds ratios over the categories and were analyzed by entering categorical variables as continuous parameters in the models (51). All statistical tests were based on two-sided probabilities using SAS, version 9.1 (SAS Institute, Inc., Cary, North Carolina).

## RESULTS

Table 1 presents the characteristics of all cases and controls. Adenoma cases, in comparison with polyp-free controls, were generally older, more likely to be male, had lower educational attainment, had lower income, had higher body mass index, were taller, and were less likely to be physically active. Most of these characteristics were also more common among hyperplastic cases and cases with both types of polyps than among controls. Ages were similar between hyperplastic cases and controls. The results were similar for both study sites (results not shown in table).

Alcohol drinking was not associated with risk of colorectal polyps (table 2). In comparison with never drinkers, persons who drank for 30 or more years had a weak and nonsignificantly increased risk of hyperplastic polyps (odds ratio = 1.3, 95 percent confidence interval (CI): 0.9, 1.8;  $p$ -trend = 0.21). Amount, age of initiation, and recency of cessation were also not associated with risk of colorectal polyps. Results for polyp risk were similar when data were restricted to screening colonoscopies, diagnostic colonoscopies, precolonoscopy recruitment, postcolonoscopy recruitment, or pilot study participants or were stratified by median time to interview (results not shown in table). To evaluate whether risk associated with alcohol use varied by sex, we performed stratified analyses (results not shown in table). Too few women were regular alcohol drinkers for us to obtain informative estimates in stratified analyses. Among men, the estimates were similar for adenoma risk and somewhat stronger for hyperplastic polyp risk, as compared with findings in the entire population. There were no clear dose-response relations between amount, duration, or recency of alcohol use and risk of developing colorectal polyps. We evaluated a possible interaction between smoking status and alcohol use and did not find one ( $p = 0.40$ ). In results stratified by study site, we also observed similar patterns of association as in the entire population and among men.

Use of any type of tobacco was significantly associated with increased risk of colorectal polyps (table 3); however, neither pipe or cigar smoking nor other forms of tobacco use, including chewing tobacco, were independently associated with risk of polyps. Current regular cigarette smoking, in comparison with never smoking, was significantly associated with increased risk for all three groups of polyp cases and was particularly strong for hyperplastic polyps (odds ratio = 4.7, 95 percent CI: 3.2, 6.8) and both types of polyps (odds ratio = 7.5, 95 percent CI: 4.8, 11.9). For the cases with hyperplastic polyps and both types of polyps, significant trends were observed with increasing number of cigarettes smoked per day, years of smoking, pack-years of smoking, and age at smoking initiation (all  $p$ 's for trend < 0.0001). Among cases with adenomas only, significant

trends were observed only with years of smoking ( $p$ -trend < 0.0001) and pack-years of smoking ( $p$ -trend = 0.003). Regardless of polyp type, the association between dose and risk was strongest for years of smoking. In comparison with never smokers, odds ratios for a smoking duration of 35 or more years were 5.0 (95 percent CI: 3.3, 7.3) for hyperplastic polyp cases, 1.9 (95 percent CI: 1.4, 2.5) for adenoma cases, and 6.9 (95 percent CI: 4.4, 11.1) for cases with both types of polyps. However, the thresholds for duration differed among the three groups. Significantly increased risks were observed with 25 or more years of smoking for adenoma cases, 15 or more years of smoking for hyperplastic polyp cases, and fewer than 15 years of smoking for cases with both polyp types.

To evaluate whether significant differences were present between the case groups, we performed case-case comparisons. For all smoking measures, in comparison with adenoma-only cases, both cases with hyperplastic polyps and cases with both types of polyps were at increased risk ( $p$ -trend < 0.0001). For all categories of smoking duration, in comparison with hyperplastic polyp-only cases, cases with both types of polyps were at elevated risk, although results were not statistically significant except for a duration of 15 years or less. Most other measures of smoking were also more strongly related to having both types of polyps than to having only hyperplastic polyps, although risk was not always significantly increased. The relations between smoking duration and polyp risk were similar when subgroup analyses were conducted for men, full-scale study participants, individual study sites, right-sided polyps, left-sided polyps, screening colonoscopies, diagnostic colonoscopies, precolonoscopy recruitment, and postcolonoscopy recruitment (results not shown in table). In comparison with current smokers, former smokers who had quit 10 or more years previously had a significantly reduced risk of polyps ( $p$ -trend < 0.0001 for all polyp cases).

## DISCUSSION

In this large case-control study, we found that cigarette smoking was associated with increased risk of adenomatous and hyperplastic colorectal polyps. The associations between cigarette smoking and increased polyp risk were particularly strong for current smoking and years of smoking and for cases with hyperplastic polyps or both types of polyps. Regular consumption of at least five alcoholic drinks per week was, at most, weakly associated with increased risk of hyperplastic polyps. There were no clear dose-response relations between measures of alcohol drinking and risk of hyperplastic polyps.

Regular alcohol intake has been reported as a risk factor for both colorectal adenoma and cancer in some (2, 7, 15–22, 38, 41–44, 52–55) but not all (6, 20, 23–27, 37, 45–47, 53, 56, 57) previous studies. In most adenoma studies with a positive finding, the association has been weak to moderate (16, 18–21, 36, 38, 43, 44, 55) and occasionally, though not always, limited to a subgroup such as men (17, 20, 43, 53), women (16, 21, 43), distal or rectal cases (26, 42, 44), proximal cases (55), large or advanced adenomas (7, 42, 43, 53), consumers of a specific type of alcohol (15, 17, 20, 26, 42,

TABLE 1. Characteristics of participants in the Tennessee Colorectal Polyp Study, 2003–2005

| Characteristic                                 | Controls    |      | Cases with colorectal polyps |      |                 |                  |      |                 |                                   |      |                 |
|------------------------------------------------|-------------|------|------------------------------|------|-----------------|------------------|------|-----------------|-----------------------------------|------|-----------------|
|                                                |             |      | Hyperplastic only            |      |                 | Adenomatous only |      |                 | Both adenomatous and hyperplastic |      |                 |
|                                                | No.         | %    | No.                          | %    | <i>p</i> value* | No.              | %    | <i>p</i> value* | No.                               | %    | <i>p</i> value* |
| Mean age (years)                               | 57.2 (7.9)† |      | 56.9 (7.2)                   |      | 0.53            | 59.6 (7.4)       |      | <0.0001         | 59.5 (6.7)                        |      | <0.0001         |
| Female sex                                     | 771         | 43.5 | 90                           | 30.1 | <0.0001         | 165              | 25.8 | <0.0001         | 38                                | 16.2 | <0.0001         |
| Race/ethnicity                                 |             |      | 0.05                         |      |                 | 0.21             |      |                 | 0.63                              |      |                 |
| White, Hispanic or non-Hispanic                | 1,532       | 86.4 | 275                          | 92.0 |                 | 532              | 83.3 |                 | 208                               | 88.5 |                 |
| Black, Hispanic or non-Hispanic                | 185         | 10.4 | 20                           | 6.7  |                 | 80               | 12.5 |                 | 23                                | 9.8  |                 |
| Other                                          | 33          | 1.9  | 2                            | 0.7  |                 | 18               | 2.8  |                 | 2                                 | 0.9  |                 |
| Unknown                                        | 23          | 1.3  | 2                            | 0.7  |                 | 9                | 1.4  |                 | 2                                 | 0.9  |                 |
| Study location                                 |             |      | <0.0001                      |      |                 | <0.0001          |      |                 | <0.0001                           |      |                 |
| Academic medical center                        | 1,155       | 65.1 | 153                          | 51.2 |                 | 329              | 51.5 |                 | 97                                | 41.3 |                 |
| Veterans Affairs medical center                | 618         | 34.9 | 146                          | 48.8 |                 | 310              | 48.5 |                 | 138                               | 58.7 |                 |
| Indication                                     |             |      | 0.47                         |      |                 | 0.13             |      |                 | 0.07                              |      |                 |
| Screening                                      | 930         | 52.5 | 146                          | 48.8 |                 | 352              | 55.1 |                 | 106                               | 45.1 |                 |
| Family history                                 | 226         | 12.8 | 35                           | 11.7 |                 | 62               | 9.7  |                 | 34                                | 14.5 |                 |
| Diagnostic/follow-up/bleeding                  | 563         | 31.8 | 105                          | 35.1 |                 | 211              | 33.0 |                 | 91                                | 38.7 |                 |
| Other                                          | 54          | 3.1  | 13                           | 4.4  |                 | 14               | 2.2  |                 | 4                                 | 1.7  |                 |
| Educational attainment                         |             |      | <0.0001                      |      |                 | 0.0002           |      |                 | <0.0001                           |      |                 |
| High school or less                            | 463         | 26.3 | 109                          | 36.6 |                 | 212              | 33.5 |                 | 90                                | 38.6 |                 |
| Some college                                   | 518         | 29.5 | 97                           | 32.6 |                 | 189              | 29.9 |                 | 83                                | 35.6 |                 |
| College graduate                               | 324         | 18.4 | 46                           | 15.4 |                 | 116              | 18.3 |                 | 33                                | 14.2 |                 |
| Graduate or professional education             | 453         | 25.8 | 46                           | 15.4 |                 | 116              | 18.3 |                 | 27                                | 11.6 |                 |
| Annual household income                        |             |      | 0.02                         |      |                 | <0.0001          |      |                 | <0.0001                           |      |                 |
| ≤\$15,000                                      | 152         | 9.1  | 40                           | 13.9 |                 | 90               | 15.0 |                 | 32                                | 14.5 |                 |
| \$15,001–\$30,000                              | 278         | 16.7 | 56                           | 19.5 |                 | 141              | 23.5 |                 | 54                                | 24.4 |                 |
| \$30,001–\$50,000                              | 364         | 21.8 | 65                           | 22.7 |                 | 122              | 20.3 |                 | 64                                | 29.0 |                 |
| >\$50,000                                      | 874         | 52.4 | 126                          | 43.9 |                 | 248              | 41.3 |                 | 71                                | 32.1 |                 |
| Family history                                 |             |      | 0.92                         |      |                 | 0.63             |      |                 | 0.41                              |      |                 |
| None                                           | 1,438       | 83.5 | 247                          | 84.6 |                 | 511              | 82.0 |                 | 181                               | 80.1 |                 |
| Polyps only                                    | 50          | 2.9  | 8                            | 2.8  |                 | 22               | 3.5  |                 | 9                                 | 4.0  |                 |
| Colorectal cancer                              | 235         | 13.6 | 37                           | 12.7 |                 | 90               | 14.5 |                 | 36                                | 15.9 |                 |
| Mean body mass index‡                          | 28.1 (5.6)  |      | 28.6 (5.0)                   |      | 0.09            | 28.6 (5.8)       |      | 0.04            | 28.6 (4.8)                        |      | 0.13            |
| Mean height (m)                                | 172.3 (9.8) |      | 175.2 (9.6)                  |      | <0.0001         | 175.2 (10.0)     |      | <0.0001         | 177.2 (8.7)                       |      | <0.0001         |
| Physically active in past 10 years             | 1,021       | 57.7 | 158                          | 52.8 | 0.12            | 329              | 51.5 | 0.007           | 104                               | 44.4 | 0.0001          |
| Mean dietary intake (servings/day)             |             |      |                              |      |                 |                  |      |                 |                                   |      |                 |
| Fruits and vegetables                          | 5.3 (3.0)   |      | 5.3 (2.9)                    |      | 0.85            | 5.5 (3.2)        |      | 0.22            | 6.4 (3.2)                         |      | <0.0001         |
| Meat                                           | 5.6 (3.6)   |      | 6.2 (4.6)                    |      | 0.09            | 5.8 (4.3)        |      | 0.34            | 6.2 (3.4)                         |      | 0.05            |
| Dairy products                                 | 1.1 (0.8)   |      | 1.1 (0.8)                    |      | 0.46            | 1.1 (0.9)        |      | 0.30            | 1.2 (0.6)                         |      | 0.09            |
| Any use of nonsteroidal antiinflammatory drugs |             |      | 0.30                         |      |                 | 0.60             |      |                 | 0.57                              |      |                 |
| Never use                                      | 657         | 37.1 | 100                          | 33.4 |                 | 248              | 38.8 |                 | 92                                | 39.2 |                 |
| Former use                                     | 85          | 4.8  | 18                           | 6.0  |                 | 28               | 4.4  |                 | 7                                 | 3.0  |                 |
| Current use                                    | 744         | 42.0 | 103                          | 34.5 |                 | 251              | 39.3 |                 | 101                               | 43.0 |                 |
| Unknown                                        | 287         | 16.2 | 78                           | 26.1 |                 | 112              | 17.5 |                 | 35                                | 14.9 |                 |
| Ever use of oral contraceptives§               | 593         | 80.4 | 76                           | 86.4 | 0.17            | 127              | 77.0 | 0.33            | 29                                | 78.4 | 0.77            |
| Postmenopausal§                                | 552         | 74.8 | 65                           | 73.9 | 0.85            | 138              | 83.6 | 0.02            | 33                                | 89.2 | 0.05            |
| Ever use of hormone replacement therapy§       | 473         | 64.0 | 60                           | 68.2 | 0.44            | 116              | 70.7 | 0.10            | 27                                | 73.0 | 0.27            |

\* *p* value for comparison with polyp-free controls from *t* tests (continuous variables) or  $\chi^2$  tests (categorical variables).

† Numbers in parentheses, standard deviation.

‡ Weight (kg)/height (m)<sup>2</sup>.

§ Among women only.

TABLE 2. Odds of developing colorectal polyps according to alcohol drinking, Tennessee Colorectal Polyp Study, 2003–2005\*

|                                          | No. of controls | Comparison of polyp cases with controls |     |          |                         |     |          |                                          |     |          | Comparison by polyp type               |          |                                  |          |                                 |          |
|------------------------------------------|-----------------|-----------------------------------------|-----|----------|-------------------------|-----|----------|------------------------------------------|-----|----------|----------------------------------------|----------|----------------------------------|----------|---------------------------------|----------|
|                                          |                 | Hyperplastic polyps only                |     |          | Adenomatous polyps only |     |          | Both hyperplastic and adenomatous polyps |     |          | Hyperplastic only vs. adenomatous only |          | Both types vs. hyperplastic only |          | Both types vs. adenomatous only |          |
|                                          |                 | No.                                     | OR† | 95% CI†  | No.                     | OR  | 95% CI   | No.                                      | OR  | 95% CI   | OR                                     | 95% CI   | OR                               | 95% CI   | OR                              | 95% CI   |
| <b>Alcohol use</b>                       |                 |                                         |     |          |                         |     |          |                                          |     |          |                                        |          |                                  |          |                                 |          |
| Never a regular drinker                  | 1,043           | 130                                     | 1.0 | Referent | 328                     | 1.0 | Referent | 107                                      | 1.0 | Referent | 1.0                                    | Referent | 1.0                              | Referent | 1.0                             | Referent |
| Former drinker                           | 433             | 105                                     | 1.2 | 0.9, 1.6 | 175                     | 0.9 | 0.7, 1.1 | 78                                       | 0.8 | 0.5, 1.1 | 1.4                                    | 1.0, 2.0 | 0.6                              | 0.4, 1.0 | 0.9                             | 0.6, 1.3 |
| Current drinker                          | 297             | 64                                      | 1.3 | 0.9, 1.9 | 132                     | 1.2 | 0.9, 1.5 | 49                                       | 0.9 | 0.6, 1.4 | 1.1                                    | 0.7, 1.7 | 0.7                              | 0.4, 1.1 | 0.8                             | 0.5, 1.2 |
| <i>p</i> -trend                          |                 |                                         |     | 0.13     |                         |     | 0.44     |                                          |     | 0.46     |                                        | 0.42     |                                  | 0.09     |                                 | 0.24     |
| <b>No. of drinks/week‡</b>               |                 |                                         |     |          |                         |     |          |                                          |     |          |                                        |          |                                  |          |                                 |          |
| 5–9                                      | 253             | 42                                      | 1.1 | 0.7, 1.6 | 77                      | 0.8 | 0.6, 1.1 | 19                                       | 0.5 | 0.3, 0.8 | 1.3                                    | 0.8, 2.1 | 0.4                              | 0.2, 0.8 | 0.6                             | 0.3, 1.0 |
| 10–19                                    | 192             | 48                                      | 1.5 | 1.0, 2.2 | 71                      | 0.9 | 0.7, 1.3 | 37                                       | 1.1 | 0.7, 1.6 | 1.6                                    | 1.0, 2.5 | 0.7                              | 0.4, 1.2 | 1.2                             | 0.7, 1.9 |
| ≥20                                      | 284             | 79                                      | 1.2 | 0.9, 1.8 | 159                     | 1.2 | 0.9, 1.5 | 71                                       | 0.9 | 0.6, 1.3 | 1.1                                    | 0.7, 1.6 | 0.7                              | 0.5, 1.2 | 0.8                             | 0.5, 1.2 |
| <i>p</i> -trend                          |                 |                                         |     | 0.16     |                         |     | 0.43     |                                          |     | 0.85     |                                        | 0.47     |                                  | 0.22     |                                 | 0.48     |
| <b>Years of drinking‡</b>                |                 |                                         |     |          |                         |     |          |                                          |     |          |                                        |          |                                  |          |                                 |          |
| 1–14                                     | 241             | 51                                      | 1.2 | 0.8, 1.8 | 69                      | 0.7 | 0.5, 1.0 | 32                                       | 0.8 | 0.5, 1.2 | 1.9                                    | 1.1, 3.0 | 0.6                              | 0.4, 1.1 | 1.1                             | 0.7, 2.0 |
| 15–29                                    | 274             | 63                                      | 1.2 | 0.8, 1.7 | 112                     | 1.1 | 0.8, 1.4 | 44                                       | 0.8 | 0.6, 1.3 | 1.1                                    | 0.7, 1.7 | 0.7                              | 0.4, 1.2 | 0.8                             | 0.5, 1.2 |
| ≥30                                      | 212             | 54                                      | 1.3 | 0.9, 1.8 | 125                     | 1.1 | 0.8, 1.5 | 50                                       | 0.9 | 0.6, 1.3 | 1.1                                    | 0.8, 1.7 | 0.7                              | 0.4, 1.1 | 0.8                             | 0.5, 1.1 |
| <i>p</i> -trend                          |                 |                                         |     | 0.21     |                         |     | 0.34     |                                          |     | 0.36     |                                        | 0.62     |                                  | 0.09     |                                 | 0.14     |
| <b>Age (years) at starting to drink‡</b> |                 |                                         |     |          |                         |     |          |                                          |     |          |                                        |          |                                  |          |                                 |          |
| 1–17                                     | 123             | 26                                      | 1.0 | 0.5, 2.1 | 43                      | 0.4 | 0.2, 0.8 | 18                                       | 0.5 | 0.3, 1.0 | 2.3                                    | 1.0, 5.4 | 0.5                              | 0.2, 1.5 | 1.2                             | 0.5, 3.1 |
| 18–19                                    | 183             | 54                                      | 1.6 | 0.8, 2.9 | 102                     | 0.8 | 0.5, 1.4 | 33                                       | 0.7 | 0.5, 1.2 | 1.9                                    | 0.9, 3.9 | 0.5                              | 0.2, 1.3 | 1.0                             | 0.4, 2.2 |
| ≥20                                      | 424             | 88                                      | 1.3 | 0.8, 2.3 | 162                     | 0.6 | 0.4, 1.0 | 76                                       | 1.0 | 0.7, 1.4 | 2.0                                    | 1.1, 3.9 | 0.8                              | 0.4, 1.8 | 1.6                             | 0.8, 3.3 |
| <i>p</i> -trend                          |                 |                                         |     | 0.13     |                         |     | 0.96     |                                          |     | 0.77     |                                        | 0.19     |                                  | 0.18     |                                 | 0.76     |
| <b>Years since quitting drinking</b>     |                 |                                         |     |          |                         |     |          |                                          |     |          |                                        |          |                                  |          |                                 |          |
| Current drinker                          | 297             | 64                                      | 1.0 | Referent | 132                     | 1.0 | Referent | 49                                       | 1.0 | Referent | 1.0                                    | Referent | 1.0                              | Referent | 1.0                             | Referent |
| 1–10                                     | 121             | 36                                      | 1.0 | 0.6, 1.7 | 52                      | 0.8 | 0.5, 1.2 | 25                                       | 0.9 | 0.5, 1.5 | 1.3                                    | 0.7, 2.2 | 0.9                              | 0.4, 1.7 | 1.1                             | 0.6, 2.0 |
| 10–19                                    | 144             | 30                                      | 0.8 | 0.5, 1.3 | 63                      | 0.8 | 0.6, 1.3 | 27                                       | 0.9 | 0.5, 1.6 | 0.9                                    | 0.5, 1.7 | 1.2                              | 0.6, 2.3 | 1.1                             | 0.6, 2.0 |
| ≥20                                      | 168             | 39                                      | 0.9 | 0.6, 1.5 | 60                      | 0.6 | 0.4, 0.9 | 26                                       | 0.7 | 0.4, 1.2 | 1.6                                    | 0.9, 2.7 | 0.8                              | 0.4, 1.5 | 1.2                             | 0.7, 2.1 |
| Never a regular drinker                  | 1,043           | 130                                     | 0.8 | 0.5, 1.1 | 328                     | 0.9 | 0.7, 1.1 | 107                                      | 1.1 | 0.7, 1.6 | 0.9                                    | 0.6, 1.3 | 1.4                              | 0.9, 2.3 | 1.3                             | 0.8, 2.0 |
| <i>p</i> -trend                          |                 |                                         |     | 0.13     |                         |     | 0.25     |                                          |     | 0.65     |                                        | 0.58     |                                  | 0.14     |                                 | 0.25     |

\* Odds ratios were adjusted for age; sex; study site; year; recruitment type (pre- or postcolonoscopy); body mass index; height; indication for colonoscopy; educational attainment; race/ethnicity; family history of cancer and polyps; use of nonsteroidal antiinflammatory drugs; physical activity; menopausal status; daily intakes of fruits and vegetables, dairy foods, and meat; and cigarette smoking.

† OR, odds ratio; CI, confidence interval.

‡ Compared with persons who never drank alcohol regularly.

53), persons with the highest levels of intake (17, 21, 42, 52, 53), or a genetically defined subgroup (21, 27, 36, 58, 59). We observed a weak association in men with any current regular alcohol drinking but no dose-dependent risk. Very few studies (2, 4–7)—mostly small (5, 6) or sigmoidoscopy-based (4, 5) studies—have evaluated the association of hyperplastic polyp risk with alcohol intake, and only one of these studies also considered the combination of hyperplastic and adenomatous polyps (2). Four of the five previous studies (4–7) found alcohol intake to be associated with

a weakly to moderately increased risk of hyperplastic polyps, although findings have not always been statistically significant (6, 7). The mechanism by which alcohol may affect polyp risk is not known. Some of the proposed mechanisms are nutritional deficiency, including folate deficiency; effects of acetaldehyde, such as hyperregeneration of the colonic mucosa, activation of procarcinogens, and generation of reactive oxygen species through the induction of cytochrome P-450 2E1; abnormal DNA methylation; and immune system suppression (60, 61).

**TABLE 3. Odds of developing colorectal polyps according to tobacco use and cigarette smoking, Tennessee Colorectal Polyp Study, 2003–2005\***

|                                          | No. of controls | Comparison of polyp cases with controls |         |          |                         |         |          |                                          |         |           | Comparison by polyp type               |          |                                  |          |                                 |          |  |
|------------------------------------------|-----------------|-----------------------------------------|---------|----------|-------------------------|---------|----------|------------------------------------------|---------|-----------|----------------------------------------|----------|----------------------------------|----------|---------------------------------|----------|--|
|                                          |                 | Hyperplastic polyps only                |         |          | Adenomatous polyps only |         |          | Both hyperplastic and adenomatous polyps |         |           | Hyperplastic only vs. adenomatous only |          | Both types vs. hyperplastic only |          | Both types vs. adenomatous only |          |  |
|                                          |                 | No.                                     | OR†     | 95% CI†  | No.                     | OR      | 95% CI   | No.                                      | OR      | 95% CI    | OR                                     | 95% CI   | OR                               | 95% CI   | OR                              | 95% CI   |  |
| <b>Type of tobacco use</b>               |                 |                                         |         |          |                         |         |          |                                          |         |           |                                        |          |                                  |          |                                 |          |  |
| Never a regular user                     | 824             | 70                                      | 1.0     | Referent | 218                     | 1.0     | Referent | 33                                       | 1.0     | Referent  | 1.0                                    | Referent | 1.0                              | Referent | 1.0                             | Referent |  |
| Pipe/other tobacco user only             | 53              | 7                                       | 1.2     | 0.5, 2.9 | 25                      | 1.2     | 0.7, 2.1 | 4                                        | 1.1     | 0.4, 3.4  | 1.0                                    | 0.4, 2.6 | 0.9                              | 0.2, 3.5 | 1.0                             | 0.3, 3.0 |  |
| Former cigarette smoker                  | 629             | 98                                      | 1.5     | 1.1, 2.2 | 238                     | 1.1     | 0.9, 1.4 | 96                                       | 2.8     | 1.8, 4.3  | 1.4                                    | 0.9, 2.1 | 1.8                              | 1.1, 3.1 | 2.5                             | 1.6, 4.0 |  |
| Current cigarette smoker                 | 252             | 116                                     | 4.8     | 3.3, 7.1 | 150                     | 1.8     | 1.3, 2.5 | 98                                       | 7.7     | 4.7, 2.4  | 2.6                                    | 1.7, 4.1 | 1.6                              | 0.9, 2.8 | 4.2                             | 2.5, 7.0 |  |
| <i>p</i> -trend                          |                 |                                         | <0.0001 |          |                         | 0.003   |          |                                          | <0.0001 |           |                                        | <0.0001  |                                  | 0.06     |                                 | <0.0001  |  |
| <b>Cigarette smoking</b>                 |                 |                                         |         |          |                         |         |          |                                          |         |           |                                        |          |                                  |          |                                 |          |  |
| Never smoker                             | 877             | 77                                      | 1.0     | Referent | 243                     | 1.0     | Referent | 37                                       | 1.0     | Referent  | 1.0                                    | Referent | 1.0                              | Referent | 1.0                             | Referent |  |
| Former smoker                            | 629             | 98                                      | 1.5     | 1.1, 2.1 | 238                     | 1.1     | 0.9, 1.4 | 96                                       | 2.7     | 1.8, 4.2  | 1.4                                    | 0.9, 2.0 | 1.8                              | 1.1, 3.1 | 2.5                             | 1.6, 3.9 |  |
| Current smoker                           | 252             | 116                                     | 4.7     | 3.2, 6.8 | 150                     | 1.8     | 1.3, 2.4 | 98                                       | 7.5     | 4.8, 11.9 | 2.6                                    | 1.7, 4.0 | 1.6                              | 0.9, 2.8 | 4.2                             | 2.6, 6.9 |  |
| <i>p</i> -trend                          |                 |                                         | <0.0001 |          |                         | 0.0005  |          |                                          | <0.0001 |           |                                        | <0.0001  |                                  | 0.15     |                                 | <0.0001  |  |
| <b>No. of cigarettes/day‡</b>            |                 |                                         |         |          |                         |         |          |                                          |         |           |                                        |          |                                  |          |                                 |          |  |
| <20                                      | 341             | 67                                      | 2.1     | 1.5, 3.1 | 135                     | 1.3     | 1.0, 1.7 | 51                                       | 3.2     | 2.0, 5.0  | 1.6                                    | 1.1, 2.5 | 1.5                              | 0.8, 2.6 | 2.4                             | 1.5, 4.0 |  |
| 20–29                                    | 293             | 72                                      | 2.2     | 1.5, 3.2 | 126                     | 1.2     | 0.8, 1.6 | 72                                       | 4.1     | 2.6, 6.5  | 1.8                                    | 1.2, 2.9 | 1.9                              | 1.1, 3.3 | 3.5                             | 2.2, 5.7 |  |
| ≥30                                      | 247             | 75                                      | 2.5     | 1.7, 3.8 | 127                     | 1.3     | 1.0, 1.7 | 71                                       | 4.5     | 2.8, 7.2  | 2.0                                    | 1.3, 3.1 | 1.8                              | 1.0, 3.1 | 3.5                             | 2.1, 5.7 |  |
| <i>p</i> -trend                          |                 |                                         | <0.0001 |          |                         | 0.09    |          |                                          | <0.0001 |           |                                        | 0.003    |                                  | 0.07     |                                 | <0.0001  |  |
| <b>Years of cigarette smoking‡</b>       |                 |                                         |         |          |                         |         |          |                                          |         |           |                                        |          |                                  |          |                                 |          |  |
| <15                                      | 266             | 19                                      | 0.7     | 0.4, 1.3 | 65                      | 0.8     | 0.6, 1.2 | 25                                       | 2.0     | 1.2, 3.5  | 0.9                                    | 0.5, 1.6 | 2.7                              | 1.3, 5.6 | 2.4                             | 1.3, 4.3 |  |
| 15–<25                                   | 179             | 37                                      | 2.1     | 1.3, 3.3 | 64                      | 1.1     | 0.8, 1.5 | 25                                       | 2.7     | 1.5, 4.7  | 2.0                                    | 1.2, 3.3 | 1.3                              | 0.6, 2.5 | 2.5                             | 1.4, 4.5 |  |
| 25–<35                                   | 193             | 51                                      | 2.8     | 1.8, 4.2 | 86                      | 1.4     | 1.0, 2.0 | 47                                       | 5.0     | 3.0, 8.2  | 1.9                                    | 1.2, 3.1 | 1.8                              | 1.0, 3.3 | 3.5                             | 2.0, 5.9 |  |
| ≥35                                      | 243             | 107                                     | 5.0     | 3.3, 7.3 | 173                     | 1.9     | 1.4, 2.5 | 97                                       | 6.9     | 4.4, 11.1 | 2.6                                    | 1.7, 4.1 | 1.4                              | 0.8, 2.5 | 3.7                             | 2.3, 6.1 |  |
| <i>p</i> -trend                          |                 |                                         | <0.0001 |          |                         | <0.0001 |          |                                          | <0.0001 |           |                                        | <0.0001  |                                  | 0.46     |                                 | <0.0001  |  |
| <b>Pack-years of cigarette smoking‡</b>  |                 |                                         |         |          |                         |         |          |                                          |         |           |                                        |          |                                  |          |                                 |          |  |
| <10                                      | 266             | 28                                      | 1.2     | 0.7, 1.8 | 78                      | 1.0     | 0.8, 1.4 | 22                                       | 1.9     | 1.1, 3.2  | 1.1                                    | 0.7, 1.9 | 1.6                              | 0.8, 3.3 | 1.8                             | 1.0, 3.2 |  |
| 10–<30                                   | 265             | 69                                      | 2.6     | 1.8, 3.8 | 111                     | 1.2     | 0.9, 1.7 | 48                                       | 3.5     | 2.2, 5.7  | 2.1                                    | 1.4, 3.3 | 1.3                              | 0.8, 2.4 | 2.8                             | 1.7, 4.7 |  |
| ≥30                                      | 350             | 117                                     | 3.1     | 2.1, 4.5 | 199                     | 1.5     | 1.1, 2.0 | 124                                      | 6.2     | 4.0, 9.7  | 2.1                                    | 1.4, 3.2 | 2.0                              | 1.2, 3.4 | 4.2                             | 2.6, 6.7 |  |
| <i>p</i> -trend                          |                 |                                         | <0.0001 |          |                         | 0.003   |          |                                          | <0.0001 |           |                                        | <0.0001  |                                  | 0.02     |                                 | <0.0001  |  |
| <b>Age (years) at starting to smoke‡</b> |                 |                                         |         |          |                         |         |          |                                          |         |           |                                        |          |                                  |          |                                 |          |  |
| <18                                      | 438             | 104                                     | 2.1     | 1.5, 3.0 | 199                     | 1.2     | 0.9, 1.5 | 97                                       | 3.3     | 2.2, 5.1  | 1.8                                    | 1.2, 2.6 | 1.6                              | 0.9, 2.6 | 2.8                             | 1.8, 4.4 |  |
| 18–20                                    | 289             | 77                                      | 2.7     | 1.9, 3.9 | 127                     | 1.3     | 1.0, 1.7 | 74                                       | 4.5     | 2.9, 7.0  | 2.1                                    | 1.4, 3.1 | 1.7                              | 1.0, 2.8 | 3.4                             | 2.2, 5.5 |  |
| ≥21                                      | 154             | 33                                      | 2.3     | 1.5, 3.7 | 62                      | 1.3     | 0.9, 1.8 | 23                                       | 2.7     | 1.5, 4.8  | 1.9                                    | 1.1, 3.1 | 1.2                              | 0.6, 2.3 | 2.2                             | 1.2, 4.0 |  |
| <i>p</i> -trend                          |                 |                                         | <0.0001 |          |                         | 0.09    |          |                                          | <0.0001 |           |                                        | 0.004    |                                  | 0.35     |                                 | 0.0002   |  |
| <b>Years since quitting smoking</b>      |                 |                                         |         |          |                         |         |          |                                          |         |           |                                        |          |                                  |          |                                 |          |  |
| Current smoker                           | 252             | 116                                     | 1.0     | Referent | 150                     | 1.0     | Referent | 98                                       | 1.0     | Referent  | 1.0                                    | Referent | 1.0                              | Referent | 1.0                             | Referent |  |
| <10                                      | 114             | 35                                      | 0.6     | 0.4, 1.0 | 62                      | 1.0     | 0.7, 1.5 | 27                                       | 0.7     | 0.4, 1.1  | 0.6                                    | 0.4, 1.1 | 1.0                              | 0.6, 1.9 | 0.7                             | 0.4, 1.1 |  |
| 10–19                                    | 146             | 31                                      | 0.4     | 0.3, 0.6 | 66                      | 0.7     | 0.5, 1.1 | 27                                       | 0.4     | 0.3, 0.7  | 0.6                                    | 0.3, 0.9 | 1.0                              | 0.6, 1.9 | 0.6                             | 0.3, 1.0 |  |
| ≥20                                      | 369             | 32                                      | 0.2     | 0.1, 0.3 | 110                     | 0.4     | 0.3, 0.6 | 42                                       | 0.2     | 0.2, 0.4  | 0.4                                    | 0.2, 0.7 | 1.4                              | 0.8, 2.5 | 0.6                             | 0.3, 0.9 |  |
| Never smoker                             | 877             | 77                                      | 0.2     | 0.1, 0.3 | 243                     | 0.5     | 0.4, 0.7 | 37                                       | 0.1     | 0.1, 0.2  | 0.4                                    | 0.2, 0.6 | 0.6                              | 0.4, 1.1 | 0.2                             | 0.1, 0.4 |  |
| <i>p</i> -trend                          |                 |                                         | <0.0001 |          |                         | <0.0001 |          |                                          | <0.0001 |           |                                        | <0.0001  |                                  | 0.31     |                                 | <0.0001  |  |

\* Odds ratios were adjusted for age; sex; study site; year; recruitment type (pre- or postcolonoscopy); body mass index; height; indication for colonoscopy; educational attainment; race/ethnicity; family history of cancer and polyps; use of nonsteroidal antiinflammatory drugs; physical activity; menopausal status; daily intakes of fruits and vegetables, dairy foods, and meat; and alcohol drinking.

† OR, odds ratio; CI, confidence interval.

‡ Compared with persons who never smoked cigarettes regularly.

In previous studies, cigarette smoking has consistently been a risk factor for colorectal adenoma (15, 19, 20, 23–26, 28, 29, 32, 33, 37, 39, 43, 53), and often it has been a strong risk factor (23, 25, 39, 44, 53, 62). Although only a handful of investigators have evaluated smoking as a risk factor for hyperplastic colorectal polyps, they, too, have mostly found an increased risk (2–9). In only two previous studies have researchers separately and jointly evaluated both hyperplastic and adenomatous polyps (2, 3). A Minnesota colonoscopy-based study found that smoking was strongly associated with increased risk of hyperplastic polyps or both hyperplastic and adenomatous polyps but was not a risk factor for adenomatous polyps alone (2). The second study, a sigmoidoscopy-based study of the Prostate, Lung, Colorectal, and Ovarian (PLCO) cancer screening trial, also observed that smoking was most strongly associated with having both types of polyps (3). These findings parallel our results. In our study and the previous two studies, over 20 percent of all cases with adenoma also had one or more hyperplastic polyps. It is possible, given the strength of our associations with smoking, that some of the previously reported observations for adenomas and smoking may be partially due to the inclusion of adenoma cases with hyperplastic polyps in the case group. However, in contrast to the Minnesota study, both our study and the PLCO study found that smoking was moderately associated with risk of adenomatous polyps.

Previous studies have found that former smokers are at reduced risk for colorectal adenomatous and hyperplastic polyps in comparison with current smokers, but to our knowledge only one previous study has evaluated whether the reduced risk varies by time since smoking cessation (3). In the PLCO evaluation of left-sided polyps, recency was the most important determinant of polyp risk (3). In comparison with current smokers, regardless of polyp type, we found that smoking cessation of as little as 10 years' duration was associated with a moderately reduced risk of polyps and that smoking cessation of 20 or more years was strongly associated with reduced risk in comparison with current smoking. This finding has potentially important public health implications for smoking cessation and should be evaluated in future studies.

Several known or probable human carcinogens are present in cigarette smoke, including polycyclic aromatic hydrocarbons, nitrosamines, heterocyclic amines, aromatic amines, and benzene (63). More recently, smoking or nicotine has been associated with hypermethylation of CpG islands and increased DNA methyltransferase activity in cancer cells, suggesting that mechanisms such as chromosomal instability or inhibition of tumor suppressor genes may also play a role in the carcinogenic process, particularly in the microsatellite instability pathway (64, 65). This may explain why smoking was more strongly associated with hyperplastic polyps in our study; CpG island methylation occurs frequently in hyperplastic polyps (66, 67). Very recently, smoking has been reported to be most strongly related to microsatellite-instability-high colorectal cancers, most of which may progress through the proposed hyperplastic-serrated adenoma pathway (68).

As with any case-control study, the possibility of selection and recall biases may be a concern in this study. Virtually all participants were recruited prior to colonoscopy and

thus prior to diagnosis. As a result, selection bias was minimized. Similarly to other case-control studies, recall bias could be a concern. However, all of these polyps were considered benign lesions; thus, the diagnosis of polyps is unlikely to have had a major impact on lifestyle changes or recall of lifestyle behaviors prior to interview. Additionally, most participants were interviewed within 13 days after the colonoscopy. The prevalence of colorectal polyps is relatively common in the general population; thus, the odds ratios estimated in our study may not have been good approximations of relative risk. Nevertheless, the odds ratio is a valid statistic for measuring the strength of an association, even for common diseases. We also used Poisson regression and found no substantial difference in the point estimates of the relative risk and odds ratio (69). Thus, properties of the odds ratio are not likely to explain the stronger association of smoking for hyperplastic polyps than for adenomas.

Unlike sigmoidoscopy-based studies, our study, based on colonoscopy, evaluated the presence of polyps in the entire colorectum. This minimized contamination of the control group with polyp cases. Another strength of our study was its large sample size. To our knowledge, it is also the largest study of both right- and left-sided polyps to have evaluated smoking and drinking in relation to the combination of adenomatous and hyperplastic polyps. We were able to evaluate many potential confounders. However, residual confounding due to dietary components may still exist, although we adjusted for intake of certain food groups. In our study, regular drinking was defined as consumption of five or more alcoholic drinks per week. If the threshold for increased or decreased risk is lower than this limit, this may explain why we did not observe an association with alcohol. As we noted above, some previous studies have found differing effects of specific alcoholic beverages (15, 17, 20, 26, 42, 53). However, we were not able to evaluate risks associated with intake of specific alcoholic beverages.

In summary, we found that risk of hyperplastic colorectal polyps was suggestively but weakly associated with duration of alcohol drinking and strongly associated with cigarette smoking. Adenoma risk, on the other hand, was only moderately associated with cigarette smoking. Having both hyperplastic and adenomatous polyps was very strongly associated with cigarette smoking. We further found that recency of smoking cessation was related to risk in a dose-dependent manner. These results are important for understanding the etiology of colorectal polyps and in designing public health strategies. Future studies are needed to confirm these findings and to elucidate the mechanisms by which cigarette smoking increases risk for colorectal polyps.

## ACKNOWLEDGMENTS

This study was supported by grants P50CA950103 and R01CA97386 from the National Cancer Institute.

The authors thank the patient advocates, staff, and faculty of the Tennessee Colorectal Polyp Study for their assistance.

Conflict of interest: none declared.

## REFERENCES

1. Fearon ER, Vogelstein B. A genetic model for colorectal tumorigenesis. *Cell* 1990;61:759–67.
2. Morimoto LM, Newcomb PA, Ulrich CM, et al. Risk factors for hyperplastic and adenomatous polyps: evidence for malignant potential? *Cancer Epidemiol Biomarkers Prev* 2002; 11:1012–18.
3. Ji BT, Weissfeld JL, Chow WH, et al. Tobacco smoking and colorectal hyperplastic and adenomatous polyps. *Cancer Epidemiol Biomarkers Prev* 2006;15:897–901.
4. Kearney J, Giovannucci E, Rimm EB, et al. Diet, alcohol, and smoking and the occurrence of hyperplastic polyps of the colon and rectum (United States). *Cancer Causes Control* 1995; 6:45–56.
5. Martinez ME, McPherson RS, Levin B, et al. A case-control study of dietary intake and other lifestyle risk factors for hyperplastic polyps. *Gastroenterology* 1997;113:423–9.
6. Erhardt JG, Kreichgauer HP, Meisner C, et al. Alcohol, cigarette smoking, dietary factors and the risk of colorectal adenomas and hyperplastic polyps—a case control study. *Eur J Nutr* 2002;41:35–43.
7. Lieberman DA, Prindiville S, Weiss DG, et al. Risk factors for advanced colonic neoplasia and hyperplastic polyps in asymptomatic individuals. *JAMA* 2003;290:2959–67.
8. Paskett ED, Reeves KW, Pineau B, et al. The association between cigarette smoking and colorectal polyp recurrence (United States). *Cancer Causes Control* 2005;16:1021–33.
9. Zahm SH, Cocco P, Blair A. Tobacco smoking as a risk factor for colon polyps. *Am J Public Health* 1991;81:846–9.
10. Wallace K, Baron JA, Karagas MR, et al. The association of physical activity and body mass index with the risk of large bowel polyps. *Cancer Epidemiol Biomarkers Prev* 2005;14: 2082–6.
11. Hawkins NJ, Ward RL. Sporadic colorectal cancers with microsatellite instability and their possible origin in hyperplastic polyps and serrated adenomas. *J Natl Cancer Inst* 2001;93: 1307–13.
12. Jass JR, Young J, Leggett BA. Hyperplastic polyps and DNA microsatellite unstable cancers of the colorectum. *Histopathology* 2000;37:295–301.
13. Snover DC, Jass JR, Fenoglio-Preiser C, et al. Serrated polyps of the large intestine: a morphologic and molecular review of an evolving concept. *Am J Clin Pathol* 2005;124:380–91.
14. Huang CS, O'Brien MJ, Yang S, et al. Hyperplastic polyps, serrated adenomas, and the serrated polyp neoplasia pathway. *Am J Gastroenterol* 2004;99:2242–55.
15. Kikendall JW, Bowen PE, Burgess MB, et al. Cigarettes and alcohol as independent risk factors for colonic adenomas. *Gastroenterology* 1989;97:660–4.
16. Cope GF, Wyatt JI, Pinder IF, et al. Alcohol consumption in patients with colorectal adenomatous polyps. *Gut* 1991;32:70–2.
17. Sandler RS, Lyles CM, McAuliffe C, et al. Cigarette smoking, alcohol, and the risk of colorectal adenomas. *Gastroenterology* 1993;104:1445–51.
18. Giovannucci E, Stampfer MJ, Colditz GA, et al. Folate, methionine, and alcohol intake and risk of colorectal adenoma. *J Natl Cancer Inst* 1993;85:875–84.
19. Martinez ME, McPherson RS, Annegers JF, et al. Cigarette smoking and alcohol consumption as risk factors for colorectal adenomatous polyps. *J Natl Cancer Inst* 1995;87:274–9.
20. Breuer-Katschinski B, Nemes K, Marr A, et al. Alcohol and cigarette smoking and the risk of colorectal adenomas. *Dig Dis Sci* 2000;45:487–93.
21. Tiemersma EW, Wark PA, Ocke MC, et al. Alcohol consumption, alcohol dehydrogenase 3 polymorphism, and colorectal adenomas. *Cancer Epidemiol Biomarkers Prev* 2003; 12:419–25.
22. Moskal A, Norat T, Ferrari P, et al. Alcohol intake and colorectal cancer risk: a dose-response meta-analysis of published cohort studies. *Int J Cancer* 2007;120:664–71.
23. Lee WC, Neugut AI, Garbowski GC, et al. Cigarettes, alcohol, coffee, and caffeine as risk factors for colorectal adenomatous polyps. *Ann Epidemiol* 1993;3:239–44.
24. Olsen J, Kronborg O. Coffee, tobacco and alcohol as risk factors for cancer and adenoma of the large intestine. *Int J Epidemiol* 1993;22:398–402.
25. Longnecker MP, Chen MJ, Probst-Hensch NM, et al. Alcohol and smoking in relation to the prevalence of adenomatous colorectal polyps detected at sigmoidoscopy. *Epidemiology* 1996;7:275–80.
26. Nagata C, Shimizu H, Kametani M, et al. Cigarette smoking, alcohol use, and colorectal adenoma in Japanese men and women. *Dis Colon Rectum* 1999;42:337–42.
27. Stern MC, Siegmund KD, Conti DV, et al. *XRCC1*, *XRCC3*, and *XPD* polymorphisms as modifiers of the effect of smoking and alcohol on colorectal adenoma risk. *Cancer Epidemiol Biomarkers Prev* 2006;15:2384–90.
28. Demers RY, Neale AV, Demers P, et al. Serum cholesterol and colorectal polyps. *J Clin Epidemiol* 1988;41:9–13.
29. Monnet E, Allemand H, Farina H, et al. Cigarette smoking and the risk of colorectal adenoma in men. *Scand J Gastroenterol* 1991;26:758–62.
30. Boffetta P, Hashibe M. Alcohol and cancer. *Lancet Oncol* 2006;7:149–56.
31. Giovannucci E, Colditz GA, Stampfer MJ, et al. A prospective study of cigarette smoking and risk of colorectal adenoma and colorectal cancer in U.S. women. *J Natl Cancer Inst* 1994; 86:192–9.
32. Terry MB, Neugut AI. Cigarette smoking and the colorectal adenoma-carcinoma sequence: a hypothesis to explain the paradox. *Am J Epidemiol* 1998;147:903–10.
33. Almendingen K, Hofstad B, Trygg K, et al. Smoking and colorectal adenomas: a case-control study. *Eur J Cancer Prev* 2000;9:193–203.
34. Terry MB, Neugut AI, Bostick RM, et al. Risk factors for advanced colorectal adenomas: a pooled analysis. *Cancer Epidemiol Biomarkers Prev* 2002;11:622–9.
35. Sarebø M, Skjelbred CF, Breistein R, et al. Association between cigarette smoking, *APC* mutations and the risk of developing sporadic colorectal adenomas and carcinomas. *BMC Cancer* 2006;6:71. (Electronic article).
36. Mitrou PN, Watson MA, Loktionov AS, et al. Role of *NQO1C609T* and *EPHX1* gene polymorphisms in the association of smoking and alcohol with sporadic distal colorectal adenomas: results from the UKFSS Study. *Carcinogenesis* 2007;28:875–82.
37. Honjo S, Kono S, Shinchi K, et al. Cigarette smoking, alcohol use and adenomatous polyps of the sigmoid colon. *Jpn J Cancer Res* 1992;83:806–11.
38. Boyapati SM, Bostick RM, McGlynn KA, et al. Folate intake, *MTHFR C677T* polymorphism, alcohol consumption, and risk for sporadic colorectal adenoma (United States). *Cancer Causes Control* 2004;15:493–501.
39. Tiemersma EW, Bunschoten A, Kok FJ, et al. Effect of *SULT1A1* and *NAT2* genetic polymorphism on the association between cigarette smoking and colorectal adenomas. *Int J Cancer* 2004;108:97–103.
40. Ashktorab H, Begum R, Akhgar A, et al. Folate status and risk of colorectal polyps in African Americans. *Dig Dis Sci* 2007;52:1462–70.



41. Austin GL, Galanko JA, Martin CF, et al. Moderate alcohol consumption protects against colorectal adenomas in smokers. *Dig Dis Sci* 2008;53:116–22.
42. Anderson JC, Alpern Z, Sethi G, et al. Prevalence and risk of colorectal neoplasia in consumers of alcohol in a screening population. *Am J Gastroenterol* 2005;100:2049–55.
43. Gondal G, Grotmol T, Hofstad B, et al. Lifestyle-related risk factors and chemoprevention for colorectal neoplasia: experience from the large-scale NORCCAP screening trial. *Eur J Cancer Prev* 2005;14:373–9.
44. Toyomura K, Yamaguchi K, Kawamoto H, et al. Relation of cigarette smoking and alcohol use to colorectal adenomas by subsite: The Self-Defense Forces Health Study. *Cancer Sci* 2004;95:72–6.
45. Kim JH, Lim YJ, Kim YH, et al. Is metabolic syndrome a risk factor for colorectal adenoma? *Cancer Epidemiol Biomarkers Prev* 2007;16:1543–6.
46. Benito E, Cabeza E, Moreno V, et al. Diet and colorectal adenomas: a case-control study in Majorca. *Int J Cancer* 1993;55:213–19.
47. Riboli E, Cornee J, Macquart-Moulin G, et al. Cancer and polyps of the colorectum and lifetime consumption of beer and other alcoholic beverages. *Am J Epidemiol* 1991;134:157–66.
48. Shin A, Shrubsole MJ, Ness RM, et al. Meat and meat-mutagen intake, doneness preference and the risk of colorectal polyps: The Tennessee Colorectal Polyp Study. *Int J Cancer* 2007;121:136–42.
49. Buchowski MS, Schlundt DG, Hargreaves MK, et al. Development of a culturally sensitive food frequency questionnaire for use in the Southern Community Cohort Study. *Cell Mol Biol (Noisy-le-Grand)* 2003;49:1295–304.
50. Hosmer DW, Lemeshow S. *Applied logistic regression*. New York, NY: John Wiley and Sons, Inc, 2000.
51. Maclure M, Greenland S. Tests for trend and dose response: misinterpretations and alternatives. *Am J Epidemiol* 1992;135:96–104.
52. Cho E, Smith-Warner SA, Ritz J, et al. Alcohol intake and colorectal cancer: a pooled analysis of 8 cohort studies. *Ann Intern Med* 2004;140:603–13.
53. Boutron MC, Faivre J, Dop MC, et al. Tobacco, alcohol, and colorectal tumors: a multistep process. *Am J Epidemiol* 1995;141:1038–46.
54. Wakai K, Kojima M, Tamakoshi K, et al. Alcohol consumption and colorectal cancer risk: findings from the JACC Study. *J Epidemiol* 2005;15(suppl 2):S173–9.
55. Kato I, Tominaga S, Matsuura A, et al. A comparative case-control study of colorectal cancer and adenoma. *Jpn J Cancer Res* 1990;81:1101–8.
56. Hoshiyama Y, Kono S, Sasaba T, et al. Relation of cigarette smoking, alcohol use, and dietary habits to colon adenomas: a case-control study in Saitama, Japan. *Asian Pac J Cancer Prev* 2000;1:139–46.
57. Yamada K, Araki S, Tamura M, et al. Case-control study of colorectal carcinoma in situ and cancer in relation to cigarette smoking and alcohol use (Japan). *Cancer Causes Control* 1999;8:780–5.
58. Gong YL, Xie DW, Deng ZL, et al. Vitamin D receptor gene Tru9I polymorphism and risk for incidental sporadic colorectal adenomas. *World J Gastroenterol* 2005;11:4794–9.
59. Ulrich CM, Kampman E, Bigler J, et al. Colorectal adenomas and the C677T *MTHFR* polymorphism: evidence for gene-environment interaction? *Cancer Epidemiol Biomarkers Prev* 1999;8:659–68.
60. Kune GA, Bannerman S, Watson LF. Attributable risk for diet, alcohol, and family history in the Melbourne Colorectal Cancer Study. *Nutr Cancer* 1992;18:231–5.
61. Seitz HK, Maurer B, Stickel F. Alcohol consumption and cancer of the gastrointestinal tract. *Dig Dis* 2005;23:297–303.
62. Giovannucci E. An updated review of the epidemiological evidence that cigarette smoking increases risk of colorectal cancer. *Cancer Epidemiol Biomarkers Prev* 2001;10:725–31.
63. National Cancer Institute. Health effects of exposure to environmental tobacco smoke: the report of the California Environmental Protection Agency. (Smoking and tobacco control monograph no. 10). Bethesda, MD: National Cancer Institute, 1999.
64. Soma T, Kaganoi J, Kawabe A, et al. Nicotine induces the fragile histidine triad methylation in human esophageal squamous epithelial cells. *Int J Cancer* 2006;119:1023–7.
65. Kikuchi S, Yamada D, Fukami T, et al. Hypermethylation of the *TSLC1/IGSF4* promoter is associated with tobacco smoking and a poor prognosis in primary nonsmall cell lung carcinoma. *Cancer* 2006;106:1751–8.
66. Herman JG, Baylin SB. Gene silencing in cancer in association with promoter hypermethylation. *N Engl J Med* 2003;349:2042–54.
67. Park SJ, Rashid A, Lee JH, et al. Frequent CpG island methylation in serrated adenomas of the colorectum. *Am J Pathol* 2003;162:815–22.
68. Chia VM, Newcomb PA, Bigler J, et al. Risk of microsatellite-unstable colorectal cancer is associated jointly with smoking and nonsteroidal anti-inflammatory drug use. *Cancer Res* 2006;66:6877–83.
69. Zou G. A modified Poisson regression approach to prospective studies with binary data. *Am J Epidemiol* 2004;159:702–6.
